# Supplementary material
Source: PubMed Central journal article supplement (PMC3993668)
Supplement: JCM.03614-13_zjm999093346so1.pdf [file JCM.03614-13_zjm999093346so1.pdf]

1 **Supplemental material**

2 **Table S1.** Characteristics of isolates with false negative results

| Group                                 | Isolate            | Source   | Phenotype ( $\beta$ -lactamase) | MIC (mg/L) <sup>a</sup> |             |          |
|---------------------------------------|--------------------|----------|---------------------------------|-------------------------|-------------|----------|
|                                       |                    |          |                                 | Cefotaxime              | Ceftazidime | Cefepime |
| Contemporary clinical isolates        | <i>E. coli</i>     | Urine    | Plasmid AmpC (CMY-2)            | 8                       | 4           | $\leq 1$ |
|                                       | <i>E. coli</i>     | Urine    | Plasmid AmpC (CMY-2)            | 8                       | 4           | $\leq 1$ |
|                                       | <i>E. coli</i>     | Urine    | Plasmid AmpC (CMY-2)            | >32                     | >16         | 8        |
|                                       | <i>E. cloacae</i>  | Wound    | AmpC hyperproduced              | >32                     | >16         | 8        |
|                                       | <i>M. morgani</i>  | Urine    | AmpC hyperproduced              | >32                     | >16         | $\leq 1$ |
|                                       | <i>P. stuartii</i> | Catheter | AmpC hyperproduced              | >32                     | 8           | $\leq 1$ |
| Isolates with characterized mechanism | <i>E. coli</i>     | Urine    | Plasmid AmpC (CMY-2)            | 4                       | 8           | 16       |
|                                       | <i>E. coli</i>     | Urine    | Plasmid AmpC (CMY-2)            | 4                       | 8           | >16      |
|                                       | <i>E. coli</i>     | Urine    | Plasmid AmpC (CMY-2)            | 4                       | 8           | >16      |

3 <sup>a</sup> S:  $\leq 1$  mg/L; I: 2-4 mg/L for ceftazidime and cefepime, 2 mg/L for cefotaxime; R: >4 for  
4 ceftazidime and cefepime, >2 mg/L for cefotaxime (1).

5

6 **Table S2.** Characteristics of isolates with non-interpretable results

| Group                                 | Isolate              | Source   | Phenotype ( $\beta$ -lactamase) | MIC (mg/L) <sup>a</sup> |             |          |
|---------------------------------------|----------------------|----------|---------------------------------|-------------------------|-------------|----------|
|                                       |                      |          |                                 | Cefotaxime              | Ceftazidime | Cefepime |
| Contemporary clinical isolates        | <i>E. coli</i>       | Wound    | Wild type (-)                   | $\leq 1$                | $\leq 1$    | $\leq 1$ |
|                                       | <i>E. coli</i>       | Urine    | ESBL (SHV-12)                   | 4                       | >16         | 8        |
|                                       | <i>E. coli</i>       | Urine    | ESBL (SHV-12)                   | 8                       | 4           | $\leq 1$ |
|                                       | <i>E. coli</i>       | Wound    | ESBL (SHV-2)                    | 8                       | 4           | 1        |
|                                       | <i>K. pneumoniae</i> | Urine    | Carbapenemase (VIM-1)           | >32                     | >16         | >16      |
| Isolates with characterized mechanism | <i>E. coli</i>       | Urine    | Carbapenemase (VIM-1)           | >32                     | >16         | >16      |
|                                       | <i>E. coli</i>       | Urine    | Carbapenemase (VIM-1)           | >32                     | >16         | >16      |
|                                       | <i>E. coli</i>       | Wound    | Carbapenemase (VIM-1)           | >32                     | >16         | >16      |
|                                       | <i>K. pneumoniae</i> | Catheter | Carbapenemase (VIM-1)           | >32                     | >16         | >16      |
|                                       | <i>K. pneumoniae</i> | Urine    | Carbapenemase (VIM-1)           | >32                     | >16         | >16      |

7 <sup>a</sup> S:  $\leq 1$  mg/L; I: 2-4 mg/L for ceftazidime and cefepime, 2 mg/L for cefotaxime; R: >4 for  
8 ceftazidime and cefepime, >2 mg/L for cefotaxime (1).

9

10

11 **References**

- 12 1. European Society of Clinical Microbiology and Infectious Diseases. *EUCAST Clinical*  
13 *Breakpoints* *Version* *3.1*  
14 [http://www.eucast.org/fileadmin/src/media/PDFs/EUCAST\\_files/Breakpoint\\_tables/Breakpoint\\_table\\_v\\_3.1.pdf](http://www.eucast.org/fileadmin/src/media/PDFs/EUCAST_files/Breakpoint_tables/Breakpoint_table_v_3.1.pdf)(20December, date last accessed)  
15
